# Supplementary material
Source: HighWire-hosted journal article supplement (https://www.cmajopen.ca/highwire/filestream/81264/field_highwire_adjunct_files/0/2019-0148-original-submission.pdf)
Supplement: 2019-0148-original-submission.pdf [file 2019-0148-original-submission.pdf]

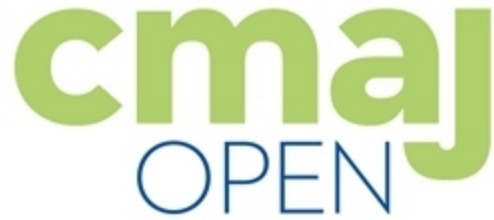

**The Frequency of Repeat Anti-Nuclear Antibody (ANA) Testing in a Single-payer universal healthcare system: A population-based study**

|                               |                                                                                                                                                                                                                                                                                                                                                                                                                                                                                                                                                                                                                                                                                                                                                                                                                                                                                                                   |
|-------------------------------|-------------------------------------------------------------------------------------------------------------------------------------------------------------------------------------------------------------------------------------------------------------------------------------------------------------------------------------------------------------------------------------------------------------------------------------------------------------------------------------------------------------------------------------------------------------------------------------------------------------------------------------------------------------------------------------------------------------------------------------------------------------------------------------------------------------------------------------------------------------------------------------------------------------------|
| Journal:                      | <i>CMAJ Open</i>                                                                                                                                                                                                                                                                                                                                                                                                                                                                                                                                                                                                                                                                                                                                                                                                                                                                                                  |
| Manuscript ID                 | CMAJOpen-2019-0148                                                                                                                                                                                                                                                                                                                                                                                                                                                                                                                                                                                                                                                                                                                                                                                                                                                                                                |
| Manuscript Type:              | Cohort (retrospective)                                                                                                                                                                                                                                                                                                                                                                                                                                                                                                                                                                                                                                                                                                                                                                                                                                                                                            |
| Date Submitted by the Author: | 10-Sep-2019                                                                                                                                                                                                                                                                                                                                                                                                                                                                                                                                                                                                                                                                                                                                                                                                                                                                                                       |
| Complete List of Authors:     | Lake, Shirley ; Sunnybrook Health Sciences Centre, Rheumatology; University of Toronto Department of Medicine, Medicine; University of Toronto Department of Medicine, Rheumatology<br>Yao, Zhan ; Institute for Clinical Evaluative Sciences<br>Gakhal, Natasha; Women's College Hospital, Division of Rheumatology; University of Toronto Department of Medicine, Division of Rheumatology<br>Steiman, Amanda; University of Toronto Department of Medicine, Medicine; Sinai Health System<br>Hawker, Gillian; University of Toronto, Department of Health Policy, Management and Evaluation, and Clinical Epidemiology and Health Care Research Program<br>Widdifield, Jessica; Institute for Clinical Evaluative Sciences                                                                                                                                                                                     |
| More Detailed Keywords:       | Anti-nuclear antibody test, population-based study, choosing wisely, Ontario Laboratories Information System, rheumatology                                                                                                                                                                                                                                                                                                                                                                                                                                                                                                                                                                                                                                                                                                                                                                                        |
| Keywords:                     | Epidemiology, Health services research, Rheumatology, Laboratory medicine                                                                                                                                                                                                                                                                                                                                                                                                                                                                                                                                                                                                                                                                                                                                                                                                                                         |
| Abstract:                     | <p><b>Background:</b><br/>Our aim was to assess the frequency and correlates of repeat ANA testing in the setting of a single-payer universal healthcare system.</p> <p><b>Methods:</b><br/>We identified all ANA tests performed over 2008-2016, and repeat testing within 12 months, among adults within the Ontario Laboratories Information System, a nearly population-wide laboratory database linked with administrative data. To assess correlates of repeat testing, and repeat testing after a positive test, we fit marginal logistic regression models by means of generalized estimating equations.</p> <p><b>Results:</b><br/>In total, 587,357 ANA tests were performed on 437,966 patients between 2008 and 2016, 23% were positive and 28% were repeats. Family physicians ordered 358,422 tests (61%) and rheumatologists ordered 65,071 tests (11%). Among 164,913 total repeat tests, 49%</p> |

1  
2  
3  
4  
5  
6  
7  
8  
9  
10  
11  
12  
13  
14  
15  
16  
17  
18  
19  
20  
21  
22  
23  
24  
25  
26  
27  
28  
29  
30  
31  
32  
33  
34  
35  
36  
37  
38  
39  
40  
41  
42  
43  
44  
45  
46  
47  
48  
49  
50  
51  
52  
53  
54  
55  
56  
57  
58  
59  
60

|  |                                                                                                                                                                                                                                                                                                                                                                                                                                                                                                                                                                                                                                                                                                                                                                                                                                                                                                                |
|--|----------------------------------------------------------------------------------------------------------------------------------------------------------------------------------------------------------------------------------------------------------------------------------------------------------------------------------------------------------------------------------------------------------------------------------------------------------------------------------------------------------------------------------------------------------------------------------------------------------------------------------------------------------------------------------------------------------------------------------------------------------------------------------------------------------------------------------------------------------------------------------------------------------------|
|  | <p>were ordered within 12 months of the previous test. Among 81,058 tests repeated within 12 months, 33,574 (41%) had a preceding positive result. Rheumatologists performed more repeat tests within 12 months (36% vs 11% other physicians). In the multivariable analyses, rheumatologists were more likely to order repeat tests and repeat testing after a positive test than other practitioners, and patients with connective tissue diseases were 4-5 times more likely to undergo repeat testing.</p> <p>Interpretation:<br/>Over a quarter of ANA tests were repeats, many of which were performed on patients with prior positive tests. Family physicians ordered more tests than other care providers, however rheumatologists are most likely to perform repeat testing. Our findings may be useful to inform quality improvement initiatives related to the appropriateness of ANA testing.</p> |
|  |                                                                                                                                                                                                                                                                                                                                                                                                                                                                                                                                                                                                                                                                                                                                                                                                                                                                                                                |

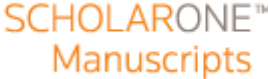

# Reporting checklist for cross sectional study.

Based on the STROBE cross sectional guidelines.

## Instructions to authors

Complete this checklist by entering the page numbers from your manuscript where readers will find each of the items listed below.

Your article may not currently address all the items on the checklist. Please modify your text to include the missing information. If you are certain that an item does not apply, please write "n/a" and provide a short explanation.

Upload your completed checklist as an extra file when you submit to a journal.

In your methods section, say that you used the STROBE cross sectional reporting guidelines, and cite them as:

von Elm E, Altman DG, Egger M, Pocock SJ, Gøtzsche PC, Vandenbroucke JP. The Strengthening the Reporting of Observational Studies in Epidemiology (STROBE) Statement: guidelines for reporting observational studies.

|                           |                     | Reporting Item                                                                                  | Page Number |
|---------------------------|---------------------|-------------------------------------------------------------------------------------------------|-------------|
| <b>Title and abstract</b> |                     |                                                                                                 |             |
| Title                     | <a href="#">#1a</a> | Indicate the study's design with a commonly used term in the title or the abstract              | 1           |
| Abstract                  | <a href="#">#1b</a> | Provide in the abstract an informative and balanced summary of what was done and what was found | 2           |
| <b>Introduction</b>       |                     |                                                                                                 |             |
| Background / rationale    | <a href="#">#2</a>  | Explain the scientific background and rationale for the investigation being reported            | 3           |
| Objectives                | <a href="#">#3</a>  | State specific objectives, including any prespecified hypotheses                                | 3-4         |
| <b>Methods</b>            |                     |                                                                                                 |             |

|    |                      |                      |                                                                   |     |
|----|----------------------|----------------------|-------------------------------------------------------------------|-----|
| 1  | Study design         | <a href="#">#4</a>   | Present key elements of study design early in the paper           | 4   |
| 2  |                      |                      |                                                                   |     |
| 3  | Setting              | <a href="#">#5</a>   | Describe the setting, locations, and relevant dates, including    | 4   |
| 4  |                      |                      | periods of recruitment, exposure, follow-up, and data collection  |     |
| 5  |                      |                      |                                                                   |     |
| 6  |                      |                      |                                                                   |     |
| 7  | Eligibility criteria | <a href="#">#6a</a>  | Give the eligibility criteria, and the sources and methods of     | 5   |
| 8  |                      |                      | selection of participants.                                        |     |
| 9  |                      |                      |                                                                   |     |
| 10 |                      |                      |                                                                   |     |
| 11 |                      | <a href="#">#7</a>   | Clearly define all outcomes, exposures, predictors, potential     | 5   |
| 12 |                      |                      | confounders, and effect modifiers. Give diagnostic criteria, if   |     |
| 13 |                      |                      | applicable                                                        |     |
| 14 |                      |                      |                                                                   |     |
| 15 |                      |                      |                                                                   |     |
| 16 | Data sources /       | <a href="#">#8</a>   | For each variable of interest give sources of data and details of | 4   |
| 17 | measurement          |                      | methods of assessment (measurement). Describe                     |     |
| 18 |                      |                      | comparability of assessment methods if there is more than one     |     |
| 19 |                      |                      | group. Give information separately for for exposed and            |     |
| 20 |                      |                      | unexposed groups if applicable.                                   |     |
| 21 |                      |                      |                                                                   |     |
| 22 |                      |                      |                                                                   |     |
| 23 |                      |                      |                                                                   |     |
| 24 | Bias                 | <a href="#">#9</a>   | Describe any efforts to address potential sources of bias         | 5-6 |
| 25 |                      |                      |                                                                   |     |
| 26 |                      |                      |                                                                   |     |
| 27 | Study size           | <a href="#">#10</a>  | Explain how the study size was arrived at                         | 5   |
| 28 |                      |                      |                                                                   |     |
| 29 | Quantitative         | <a href="#">#11</a>  | Explain how quantitative variables were handled in the            | 5   |
| 30 | variables            |                      | analyses. If applicable, describe which groupings were chosen,    |     |
| 31 |                      |                      | and why                                                           |     |
| 32 |                      |                      |                                                                   |     |
| 33 |                      |                      |                                                                   |     |
| 34 | Statistical          | <a href="#">#12a</a> | Describe all statistical methods, including those used to control | 5   |
| 35 | methods              |                      | for confounding                                                   |     |
| 36 |                      |                      |                                                                   |     |
| 37 |                      |                      |                                                                   |     |
| 38 | Statistical          | <a href="#">#12b</a> | Describe any methods used to examine subgroups and                | 5-6 |
| 39 | methods              |                      | interactions                                                      |     |
| 40 |                      |                      |                                                                   |     |
| 41 |                      |                      |                                                                   |     |
| 42 | Statistical          | <a href="#">#12c</a> | Explain how missing data were addressed                           | 5   |
| 43 | methods              |                      |                                                                   |     |
| 44 |                      |                      |                                                                   |     |
| 45 |                      |                      |                                                                   |     |
| 46 | Statistical          | <a href="#">#12d</a> | If applicable, describe analytical methods taking account of      | 6   |
| 47 | methods              |                      | sampling strategy                                                 |     |
| 48 |                      |                      |                                                                   |     |
| 49 |                      |                      |                                                                   |     |
| 50 | Statistical          | <a href="#">#12e</a> | Describe any sensitivity analyses                                 | 6   |
| 51 | methods              |                      |                                                                   |     |
| 52 |                      |                      |                                                                   |     |
| 53 |                      |                      |                                                                   |     |
| 54 | <b>Results</b>       |                      |                                                                   |     |
| 55 |                      |                      |                                                                   |     |
| 56 | Participants         | <a href="#">#13a</a> | Report numbers of individuals at each stage of study—eg           | 6-7 |
| 57 |                      |                      | numbers potentially eligible, examined for eligibility, confirmed |     |
| 58 |                      |                      |                                                                   |     |
| 59 |                      |                      |                                                                   |     |
| 60 |                      |                      |                                                                   |     |

eligible, included in the study, completing follow-up, and analysed. Give information separately for for exposed and unexposed groups if applicable.

|    |                   |                      |                                                                                                                                                                                                                                |
|----|-------------------|----------------------|--------------------------------------------------------------------------------------------------------------------------------------------------------------------------------------------------------------------------------|
| 1  |                   |                      |                                                                                                                                                                                                                                |
| 2  |                   |                      |                                                                                                                                                                                                                                |
| 3  |                   |                      |                                                                                                                                                                                                                                |
| 4  |                   |                      |                                                                                                                                                                                                                                |
| 5  | Participants      | <a href="#">#13b</a> | Give reasons for non-participation at each stage 7                                                                                                                                                                             |
| 6  |                   |                      |                                                                                                                                                                                                                                |
| 7  | Participants      | <a href="#">#13c</a> | Consider use of a flow diagram N/A                                                                                                                                                                                             |
| 8  |                   |                      |                                                                                                                                                                                                                                |
| 9  |                   |                      |                                                                                                                                                                                                                                |
| 10 | Descriptive data  | <a href="#">#14a</a> | Give characteristics of study participants (eg demographic, 7-8<br>clinical, social) and information on exposures and potential<br>confounders. Give information separately for exposed and<br>unexposed groups if applicable. |
| 11 |                   |                      |                                                                                                                                                                                                                                |
| 12 |                   |                      |                                                                                                                                                                                                                                |
| 13 |                   |                      |                                                                                                                                                                                                                                |
| 14 |                   |                      |                                                                                                                                                                                                                                |
| 15 |                   |                      |                                                                                                                                                                                                                                |
| 16 |                   |                      |                                                                                                                                                                                                                                |
| 17 | Descriptive data  | <a href="#">#14b</a> | Indicate number of participants with missing data for each  N/A<br>variable of interest                                                                                                                                        |
| 18 |                   |                      |                                                                                                                                                                                                                                |
| 19 |                   |                      |                                                                                                                                                                                                                                |
| 20 |                   |                      |                                                                                                                                                                                                                                |
| 21 | Outcome data      | <a href="#">#15</a>  | Report numbers of outcome events or summary measures. 6-7<br>Give information separately for exposed and unexposed<br>groups if applicable.                                                                                    |
| 22 |                   |                      |                                                                                                                                                                                                                                |
| 23 |                   |                      |                                                                                                                                                                                                                                |
| 24 |                   |                      |                                                                                                                                                                                                                                |
| 25 |                   |                      |                                                                                                                                                                                                                                |
| 26 | Main results      | <a href="#">#16a</a> | Give unadjusted estimates and, if applicable, confounder- 7-8<br>adjusted estimates and their precision (eg, 95% confidence<br>interval). Make clear which confounders were adjusted for and<br>why they were included         |
| 27 |                   |                      |                                                                                                                                                                                                                                |
| 28 |                   |                      |                                                                                                                                                                                                                                |
| 29 |                   |                      |                                                                                                                                                                                                                                |
| 30 |                   |                      |                                                                                                                                                                                                                                |
| 31 |                   |                      |                                                                                                                                                                                                                                |
| 32 |                   |                      |                                                                                                                                                                                                                                |
| 33 | Main results      | <a href="#">#16b</a> | Report category boundaries when continuous variables were  N/A<br>categorized                                                                                                                                                  |
| 34 |                   |                      |                                                                                                                                                                                                                                |
| 35 |                   |                      |                                                                                                                                                                                                                                |
| 36 |                   |                      |                                                                                                                                                                                                                                |
| 37 | Main results      | <a href="#">#16c</a> | If relevant, consider translating estimates of relative risk into  N/A<br>absolute risk for a meaningful time period                                                                                                           |
| 38 |                   |                      |                                                                                                                                                                                                                                |
| 39 |                   |                      |                                                                                                                                                                                                                                |
| 40 |                   |                      |                                                                                                                                                                                                                                |
| 41 | Other analyses    | <a href="#">#17</a>  | Report other analyses done—e.g., analyses of subgroups and 7-8<br>interactions, and sensitivity analyses                                                                                                                       |
| 42 |                   |                      |                                                                                                                                                                                                                                |
| 43 |                   |                      |                                                                                                                                                                                                                                |
| 44 | <b>Discussion</b> |                      |                                                                                                                                                                                                                                |
| 45 |                   |                      |                                                                                                                                                                                                                                |
| 46 | Key results       | <a href="#">#18</a>  | Summarise key results with reference to study objectives 8                                                                                                                                                                     |
| 47 |                   |                      |                                                                                                                                                                                                                                |
| 48 |                   |                      |                                                                                                                                                                                                                                |
| 49 | Limitations       | <a href="#">#19</a>  | Discuss limitations of the study, taking into account sources of 10<br>potential bias or imprecision. Discuss both direction and<br>magnitude of any potential bias.                                                           |
| 50 |                   |                      |                                                                                                                                                                                                                                |
| 51 |                   |                      |                                                                                                                                                                                                                                |
| 52 |                   |                      |                                                                                                                                                                                                                                |
| 53 |                   |                      |                                                                                                                                                                                                                                |
| 54 | Interpretation    | <a href="#">#20</a>  | Give a cautious overall interpretation considering objectives, 8-10<br>limitations, multiplicity of analyses, results from similar studies,<br>and other relevant evidence.                                                    |
| 55 |                   |                      |                                                                                                                                                                                                                                |
| 56 |                   |                      |                                                                                                                                                                                                                                |
| 57 |                   |                      |                                                                                                                                                                                                                                |
| 58 |                   |                      |                                                                                                                                                                                                                                |
| 59 |                   |                      |                                                                                                                                                                                                                                |
| 60 |                   |                      |                                                                                                                                                                                                                                |

|    |                    |                     |                                                                   |    |
|----|--------------------|---------------------|-------------------------------------------------------------------|----|
| 1  | Generalisability   | <a href="#">#21</a> | Discuss the generalisability (external validity) of the study     | 10 |
| 2  |                    |                     | results                                                           |    |
| 3  |                    |                     |                                                                   |    |
| 4  |                    |                     |                                                                   |    |
| 5  | <b>Other</b>       |                     |                                                                   |    |
| 6  | <b>Information</b> |                     |                                                                   |    |
| 7  |                    |                     |                                                                   |    |
| 8  |                    |                     |                                                                   |    |
| 9  | Funding            | <a href="#">#22</a> | Give the source of funding and the role of the funders for the    | 11 |
| 10 |                    |                     | present study and, if applicable, for the original study on which |    |
| 11 |                    |                     | the present article is based                                      |    |
| 12 |                    |                     |                                                                   |    |
| 13 |                    |                     |                                                                   |    |

14 The STROBE checklist is distributed under the terms of the Creative Commons Attribution License  
15 CC-BY. This checklist was completed on 11. September 2019 using <https://www.goodreports.org/>, a  
16 tool made by the [EQUATOR Network](#) in collaboration with [Penelope.ai](#)  
17  
18  
19  
20  
21  
22  
23  
24  
25  
26  
27  
28  
29  
30  
31  
32  
33  
34  
35  
36  
37  
38  
39  
40  
41  
42  
43  
44  
45  
46  
47  
48  
49  
50  
51  
52  
53  
54  
55  
56  
57  
58  
59  
60

Confidential

**Title:** The Frequency of Repeat Anti-Nuclear Antibody (ANA) Testing in a Single-payer universal healthcare system: A population-based study

**Authors:**

**Shirley Lake** MD FRCPC MSc<sup>1</sup>, **Zhan Yao** MD MS<sup>2</sup>, **Natasha Gakhal** MD FRCPC MSc<sup>3</sup>, **Amanda Steiman** MD FRCPC MSc<sup>4</sup>, **Gillian Hawker** MD FRCPC MSc<sup>2,3,5</sup>, **Jessica Widdifield** PhD<sup>1,2,5</sup>

**Affiliations**

1. Holland Bone & Joint Program, Sunnybrook Research Institute, Toronto, Ontario, Canada
2. ICES, Toronto, Ontario, Canada
3. Women's College Hospital, Toronto, Ontario, Canada
4. Sinai Health System, University of Toronto, Ontario, Canada
5. University of Toronto, Institute of Health Policy, Management & Evaluation, Toronto, Ontario, Canada

**Correspondence:**

Dr. Shirley Lake MD MSc FRCPC,  
Assistant Professor of Medicine, Division of Rheumatology, University of Toronto, M1400 G  
Sunnybrook Health Sciences Centre, 2075 Bayview Avenue, Toronto, Ontario, Canada, M4N  
3M5. Phone 1-416-480-6100 x4580, Fax 1-416-480-4233. Email:  
[Shirley.Lake@sunnybrook.ca](mailto:Shirley.Lake@sunnybrook.ca).

**Competing Interests:** None

**Manuscript Details:**

Manuscript word count: 2310

Abstract word count: 248

Number of references: 34

Number of Figures: 1

Number of tables: 3

**ABSTRACT****Background:**

Our aim was to assess the frequency and correlates of repeat ANA testing in the setting of a single-payer universal healthcare system.

**Methods:**

We identified all ANA tests performed over 2008-2016, and repeat testing within 12 months, among adults within the Ontario Laboratories Information System, a nearly population-wide laboratory database linked with administrative data. To assess correlates of repeat testing, and repeat testing after a positive test, we fit marginal logistic regression models by means of generalized estimating equations.

**Results:**

In total, 587,357 ANA tests were performed on 437,966 patients between 2008 and 2016, 23% were positive and 28% were repeats. Family physicians ordered 358,422 tests (61%) and rheumatologists ordered 65,071 tests (11%). Among 164,913 total repeat tests, 49% were ordered within 12 months of the previous test. Among 81,058 tests repeated within 12 months, 33,574 (41%) had a preceding positive result. Rheumatologists performed more repeat tests within 12 months (36% vs 11% other physicians). In the multivariable analyses, rheumatologists were more likely to order repeat tests and repeat testing after a positive test than other practitioners, and patients with connective tissue diseases were 4-5 times more likely to undergo repeat testing.

**Interpretation:**

Over a quarter of ANA tests were repeats, many of which were performed on patients with prior positive tests. Family physicians ordered more tests than other care providers, however rheumatologists are most likely to perform repeat testing. Our findings may be useful to inform quality improvement initiatives related to the appropriateness of ANA testing.

N= 248/250



## INTRODUCTION

Laboratory testing is the highest volume procedure in medicine<sup>1</sup> and testing volumes are growing each year<sup>2 3</sup>. Previous research has shown that approximately 20% of tests are ordered unnecessarily and at least 15% of tests are repeated unnecessarily<sup>4 5</sup>. Misuse of laboratory tests is a major challenge impacting sustainability of health care<sup>6 7</sup>. Inappropriate overuse of laboratory tests reflects a wasteful clinical practice that threatens the value of health care, may result in medical errors, potential morbidity from follow-up investigations and interventions<sup>4</sup>. Thus, understanding the frequency and correlates of potentially redundant laboratory testing is useful to identify areas for quality improvement initiatives.

Patients with suspected autoimmune inflammatory disease often undergo a diagnostic serologic work-up that may include anti-nuclear antibody (ANA) testing. ANA is a sensitive test for systemic lupus erythematosus (SLE), thus it is appropriate to order this test to screen in the presence of signs or symptoms of SLE or other systemic autoimmune rheumatic diseases (SARDs)<sup>8</sup>. However, ANA has a low specificity and can be seen in other SARDs, other conditions, and healthy individuals, making its interpretation challenging<sup>8</sup>. Inappropriate ANA testing may cause confusion and anxiety among patients, and may even lead to over diagnosis, over treatment, unnecessary consultations, and avoidable costs to patients and payers<sup>9-13</sup>. ANA tests are useful only as an adjunct to support the clinical impression and are not useful in monitoring disease or relapse, thus it may also be inappropriate to order repeat ANA tests, especially if the previous test was already positive<sup>7 14</sup>. Recommendations to limit repeat ANA testing have been endorsed<sup>15-17</sup>. Moreover, given the rare incidence of SARDs<sup>18-20</sup>, and previous research suggesting that ANA tests are often ordered serially and/or in the setting of low pretest probability<sup>9 21 22</sup>, understanding the patterns of ANA testing in both primary and specialty care will be useful to inform quality improvement initiatives assessing

1  
2  
3 the appropriateness of ANA testing. Therefore, our aim was to assess the frequency and  
4 correlates of repeat ANA testing in the setting of a single-payer universal healthcare system.  
5  
6  
7  
8

## 9 **METHODS**

10  
11 **Design and Setting.** We performed a retrospective study using linked health administrative  
12 databases in Ontario from 2008 to 2016. Ontario is a large, diverse province that constitutes  
13 approximately 40% of Canada's population, with 13 million residents in 2015<sup>23 24</sup>. All residents  
14 are covered by a universal, single-payer, public health insurance that includes hospital care  
15 and physicians' services.  
16  
17  
18  
19  
20

21  
22 **Sources of Data.** ANA tests (including dates, tests results and ordering physician) were  
23 identified using Logical Observation Identifiers Names and Codes (LOINC) from the Ontario  
24 Laboratories Information System (OLIS), a nearly population-wide database of laboratory test  
25 results in Ontario. Patients with ANA tests were linked to the Ontario Health Insurance Plan  
26 (OHIP) Claims History Database to identify diagnoses (according to a modification of the 8th  
27 revision of the International Classification of Diseases (ICD)) associated with physician  
28 services, and to the Canadian Institute for Health Information Discharge Abstract Database to  
29 identify hospital admissions. We identified patient demographic information from the OHIP  
30 Registered Persons Database. Ordering physician specialty was identified by linking with the  
31 ICES Physician Database (IPDB), which is a validated physician registry.  
32  
33  
34  
35  
36  
37  
38  
39  
40  
41  
42

43 These datasets are linked using unique, encoded patient and physician identifiers and are  
44 securely held and analyzed at ICES ([www.ices.on.ca](http://www.ices.on.ca)). ICES is a prescribed entity under  
45 section 45 of Ontario's Personal Health Information Protection Act (PHIPA). This study was  
46 authorized under section 45 of PHIPA, which does not require review by a Research Ethics  
47 Board.  
48  
49  
50  
51  
52  
53  
54  
55

1  
2  
3 **Participant Eligibility.** Patients were excluded if they were <18 years of age, had missing  
4 patient or physician identifiers, lived out of province, or died on the date of their first ANA test.  
5

6  
7 **Outcome Measures.** Tests were classified as potentially redundant if they were repeated  
8 within 12 months of a previous test or repeated subsequent to a previous positive test result.  
9  
10 Our primary outcome was any test performed within 1 year of a previous test. Our secondary  
11 outcome was any repeat test in which the previous test was positive.  
12  
13

14  
15 **Covariates.** Patient-level covariates included age, sex, income quintile as a proxy for  
16 socioeconomic status based upon patients' postal code and census neighbourhood income  
17 quintile), rural versus urban residence, regional health services planning areas (Local Health  
18 Integration Networks, year of testing, hospitalization in the 6 months prior to testing, Charlson  
19 comorbidity score, and diagnoses codes for connective tissue diseases (OHIP codes 710 or  
20 695). Physician-level covariates included specialty (rheumatologist, internal medicine, family  
21 medicine or other), age, sex, whether they were international medical graduates, and if they  
22 practiced in academic or community settings.  
23  
24

25  
26 **Statistical Analysis.** We assessed the frequency of health system-level, patient-level and  
27 provider-level ANA testing, as well as repeat testing for individual patients within 12 months of  
28 a previous test. The frequency of total ANA tests performed, positive test results, and repeat  
29 ANA tests performed with 12 months of a previous test was determined overall and by  
30 ordering physician type (stratified by family physicians, rheumatologists, internal medicine,  
31 and all other practitioners). Repeat testing overall (regardless of who performed the previous  
32 test) and repeat testing by the same provider who performed the previous test were  
33 separately determined. Percentages were expressed using the denominator for the total  
34 number of ANA tests, and the total number of patients with ANA tests, separately. Time  
35 intervals between repeated ANA testing were assessed in relation to preceding negative or  
36  
37  
38  
39  
40  
41  
42  
43  
44  
45  
46  
47  
48  
49  
50  
51  
52  
53  
54  
55

1  
2  
3 positive test results. We assessed patient characteristics for those with multiple ANA testing to  
4 those who only received one test.  
5

6  
7 To assess patient and provider-level factors associated with the odds of repeat testing within  
8 12 months of a previous test, as well as any repeat test in which the previous test was  
9 positive, we fit two separate marginal logistic regression models by means of generalized  
10 estimating equations (GEE), both models accounting for physician demographics and patient  
11 demographic and clinical characteristics (the above aforementioned covariates). The primary  
12 analysis focused on all repeat testing irrespective of the provider who ordered the previous  
13 test. A sensitivity analysis was performed to assess correlates of repeat ANA testing confined  
14 to the same provider ordering the previous test.  
15  
16  
17  
18  
19  
20  
21  
22  
23  
24  
25

## 26 RESULTS

27  
28 **Patterns of ANA Testing.** In total, 587,357 ANA tests were performed between 2008 and  
29 2016, and 82,332 (14.0%) were repeat tests within 12 months of a previous test, and 126,322  
30 (21.5%) tests had a positive test result, table 1, with a total 74,848 (17.1%) tests being  
31 positive on their first test. We identified 7,084 physicians who performed ANA testing of which  
32 188 were rheumatologists, and 4,643 family physicians. Family physicians ordered 358,422  
33 tests (61%) and rheumatologists ordered 65,071 tests (11%). Compared to other care  
34 practitioners, rheumatologists had the highest frequency of positive test results and performed  
35 more repeat tests within 12 months.  
36  
37  
38  
39  
40  
41  
42  
43  
44

45 Among a total 164,913 repeat tests during the study period, 28,515 (17.3%) tests were  
46 performed within 3 months of the previous test, and 81,058 (49.2%) within 12 months (Figure  
47 1). Among 81,058 tests repeated within 12 months, 33,574 (41%) had a preceding positive  
48 result.  
49  
50  
51  
52  
53  
54  
55

**Patient Characteristics.** The 587,357 ANA tests were performed on 437,966 patients, 346,282 (79.1%) had only 1 ANA test, and 91,684 (20.9%) patients had multiple ANA tests performed (63,084 (14.4%) had only 2 tests, 17,000 (3.9%) had only 3 tests, 5,857 (1.3%) had only 4 tests, and 5,743 (1.3%) had 5 or more tests). Of the 437,966 patients who underwent ANA testing, 294,130 (67.2%) were female with a mean ( $\pm$ SD) age of 52.4 (16.3) years.

Only 74,849 (17.1%) had a positive ANA on their first test. Among 61,684 (67.3%) patients who received multiple ANA tests and their initial test was negative, their subsequent ANA tests did not turn positive.

Comparing 346,282 patients with single ANA testing to 91,684 patients who had multiple repeat ANA testing (Table 2), a higher percentage of females (65.4% vs 73.9%), and presence of a query or confirmed diagnoses of connective tissue diseases (3.9% vs 11.4%) was observed among patients with multiple ANA testing.

**Patient and Physician Factors Associated with Repeat ANA Testing.** Table 3 provides patient and physician characteristics associated with potentially redundant ANA testing. Family physicians, internal medicine specialists, and all other care practitioners were significantly less likely to order repeat testing within 1 year, or repeat testing after a positive test result in comparison to rheumatologists. When we confined our analyses to focus on only repeat testing performed by the same physician, odds ratios (OR) remained significant. Physician demographics did not appear to be significantly associated with repeat testing, with the exception of internationally-trained medical graduates being less likely to order repeat testing within 12 months (adjusted OR 0.81 95% CI 0.70,0.93), and repeat testing after a previous positive test result (OR 0.75 95% CI 0.63,0.88).

Female patients, those with a higher socioeconomic status and greater comorbidities were more likely to undergo repeat ANA testing within 12 months. Individuals with suspected or confirmed connective tissue disease were significantly more likely to undergo repeat ANA

1  
2  
3 testing within 12 months (OR 2.20 95% CI 2.01, 2.41) for any physician, (OR 3.08 95% CI  
4 2.70,3.51) for the same physician, and 4 to 5 times more likely to undergo repeat testing after  
5 a previous positive test result.  
6  
7  
8  
9

## 10 11 **INTERPRETATION**

12  
13 We performed a population-based study assessing the frequency and correlates of repeat  
14 ANA testing in the setting of a single-payer universal healthcare system. Over a quarter of  
15 ANA tests were repeat tests, and 14% were potentially redundant repeat tests performed  
16 within 12 months of a previous test. Family physicians ordered the most ANA tests however,  
17 rheumatologists were more likely to order repeat tests and repeat testing after a positive test  
18 result than other care practitioners. Moreover, the volume of ANA testing performed in Ontario,  
19 Canada far exceeds the number of expected new cases of connective tissues diseases at the  
20 population-level raising concerns of potential overuse of ANA testing performed on patients.  
21 Future research investigating what clinical features compel physicians to order ANA could  
22 speak to the clinical appropriateness of the high number of ANAs ordered. Overall, our novel  
23 findings will be useful to inform quality improvement initiatives related to the appropriateness  
24 of ANA screening and repeat testing.  
25  
26  
27  
28  
29  
30  
31  
32  
33  
34  
35  
36  
37  
38

39 Our study is consistent with previous studies showing that ANA testing is pervasive in  
40 the context of rheumatology practice<sup>12 13 21 22 25-27</sup>. We also observed similar frequencies of  
41 ANA positivity in our sample and also identified that family physicians order the majority of  
42 ANA tests<sup>21 26</sup>. Our findings show that rheumatologists were most likely to perform duplicate  
43 testing, which is consistent with a recent Canadian study<sup>21</sup>. However, the proportion of  
44 potentially redundant repeat ANA testing in our sample is higher than previous studies<sup>21 26 28</sup>.  
45 Potential explanations for the higher frequency of repeat ANA testing in our sample may be a  
46  
47  
48  
49  
50  
51  
52  
53  
54  
55

1  
2  
3 reflection of our ability to capture the majority of tests performed across providers and testing  
4 centers in Ontario, and the universal healthcare system in which this study was performed.  
5  
6

7 There may be multiple reasons why rheumatologists order repeat ANA tests, including  
8 issues surrounding access to and perceived accuracy in previous results. Yet, a recent  
9 Canadian survey identified that many rheumatologists feel that they are correctly ordering  
10 ANA, and that the Choosing Wisely lists do not apply to them since only family physicians  
11 inappropriately order ANA test<sup>29</sup>. However, in one Canadian city, rheumatologists were found  
12 to be the third highest laboratory spenders per physician by specialty<sup>30</sup> raising concerns over  
13 the volume of laboratory testing being performed on their patient populations. Improving the  
14 appropriateness of rheumatology laboratory testing is a priority of Choosing Wisely  
15 campaigns<sup>15 17</sup>, where the American College of Rheumatology's Pediatric Choosing Wisely  
16 recommendation is to not repeat a confirmed positive ANA in patients with established SLE or  
17 juvenile idiopathic arthritis (JIA)<sup>31</sup>. Besides autoimmune eye disease screening in JIA, there is  
18 no evidence that ANA is valuable in the ongoing management of SLE or JIA once a diagnosis  
19 is made. This is true in adults as well, where widely established evidence shows that repeat  
20 ANA has little clinical value in monitoring disease activity or predicting a flare in SARDs<sup>14 32 33</sup>.  
21 Thus, serial ANA testing is not recommended in patients with a known positive ANA.  
22  
23  
24  
25  
26  
27  
28  
29  
30  
31  
32  
33  
34  
35  
36  
37  
38

39 Fortunately, unnecessary test repetition is readily modifiable both through increasing  
40 education and awareness of overuse, and by enhancing access to outside health records and  
41 sharing results<sup>5</sup>. Targeted strategies can be highly effective in improving appropriate ANA  
42 testing<sup>28</sup>. There is evidence that multiple, linked interventions coupled with computerized order  
43 set modifications can affect lasting change in ordering behaviors<sup>34</sup>. In one study, a  
44 combination of education and feedback on ANA test ordering patterns was successful in  
45 significantly decreasing ANA testing, repeat ANA test ordering, and variation in test ordering  
46  
47  
48  
49  
50  
51  
52  
53  
54  
55

1  
2  
3 practices between rheumatologists<sup>28</sup>. Our findings will inform quality improvement initiatives  
4 related to the appropriateness of ANA testing.  
5  
6

7 The strength of our study is that it includes a large population, reflecting real-life  
8 clinical practice. A limitation is that we do not have clinical data available to comment on the  
9 reasons for repeat testing. While we were unable to determine the clinical reason to support  
10 repeat testing, many patients with suspected or confirmed connective tissue diseases had  
11 repeat testing. We were also unable to access ANA titres, subserologies, or testing which  
12 was ordered but not performed by the patient. We did not study the issue of underscreening in  
13 targeted populations, which is another form of poor quality of care that may result in  
14 unnecessary downstream health care spending associated with delayed diagnosis and  
15 undertreatment. Finally, this study was conducted in one province of Canada but over use of  
16 laboratory tests is a global issue.  
17  
18  
19  
20  
21  
22  
23  
24  
25  
26  
27

28 In summary, we identified a significant number of potentially redundant ANA testing,  
29 with rheumatologists most likely to perform repeat testing. A large proportion of repeat ANA  
30 tests had a preceding positive and were repeatedly performed by the same physician. The  
31 possible reasons for this repeat ordering are varied but it is clear that there is a role for  
32 reducing repeat ANA ordering in clinical practice.  
33  
34  
35  
36  
37  
38  
39  
40  
41  
42  
43  
44  
45  
46  
47  
48  
49  
50  
51  
52  
53  
54  
55



## ACKNOWLEDGEMENTS

The study was supported by the University of Toronto, Pfizer Chair in Rheumatology Research Award, who played no role in the design or conduct of the study, other than providing peer-review of the study proposal. This study was also supported by ICES, which is funded by an annual grant from the Ontario Ministry of Health and Long-Term Care (MOHLTC). Parts of this material are based on data and information compiled and provided by the MOHLTC. The analyses, conclusions, opinions and statements expressed herein are solely those of the authors and do not reflect those of the funding or data sources; no endorsement is intended or should be inferred.

## AUTHOR CONTRIBUTIONS

All authors were involved in drafting the article or revising it critically for important intellectual contact, and all authors approved the final version to be published.

**Study conception and design.** Shirley Lake, Zhan Yao, Natasha Gakhal, Amanda Steiman, Gillian Hawker, Jessica Widdifield

**Acquisition of data.** Zhan Yao, Gillian Hawker, Jessica Widdifield

**Analysis and interpretation of data.** Shirley Lake, Zhan Yao, Natasha Gakhal, Amanda Steiman, Gillian Hawker, Jessica Widdifield

## REFERENCES

1. McGregor MJ, Martin D. Testing 1, 2, 3: is overtesting undermining patient and system health? *Can Fam Physician* 2012;58(11):1191-3, e615-7. [published Online First: 2012/11/16]
2. McGrail KM, Evans RG, Barer ML, et al. Diagnosing senescence: contributions to physician expenditure increases in british columbia, 1996/97 to 2005/06. *Healthc Policy* 2011;7(1):41-54. [published Online First: 2012/08/02]
3. Sivananthan SN, Peterson S, Lavergne R, et al. Designation, diligence and drift: understanding laboratory expenditure increases in British Columbia, 1996/97 to 2005/06. *BMC Health Serv Res* 2012;12:472. doi: 10.1186/1472-6963-12-472 [published Online First: 2012/12/22]
4. Zhi M, Ding EL, Theisen-Toupal J, et al. The landscape of inappropriate laboratory testing: a 15-year meta-analysis. *PLoS One* 2013;8(11):e78962. doi: 10.1371/journal.pone.0078962 [published Online First: 2013/11/22]
5. Lyu H, Xu T, Brotman D, et al. Overtreatment in the United States. *PLoS One* 2017;12(9):e0181970. doi: 10.1371/journal.pone.0181970 [published Online First: 2017/09/07]
6. Bates DW, Goldman L, Lee TH. Contaminant blood cultures and resource utilization. The true consequences of false-positive results. *JAMA* 1991;265(3):365-9. [published Online First: 1991/01/16]
7. Fritzler MJ. Choosing wisely: Review and commentary on anti-nuclear antibody (ANA) testing. *Autoimmun Rev* 2016;15(3):272-80. doi: 10.1016/j.autrev.2015.12.002 [published Online First: 2015/12/22]
8. Castro C, Gourley M. Diagnostic testing and interpretation of tests for autoimmunity. *J Allergy Clin Immunol* 2010;125(2 Suppl 2):S238-47. doi: 10.1016/j.jaci.2009.09.041 [published Online First: 2010/01/12]
9. Fitch-Rogalsky C, Steber W, Mahler M, et al. Clinical and serological features of patients referred through a rheumatology triage system because of positive antinuclear antibodies. *PLoS One* 2014;9(4):e93812. doi: 10.1371/journal.pone.0093812 [published Online First: 2014/04/08]
10. Narain S, Richards HB, Satoh M, et al. Diagnostic accuracy for lupus and other systemic autoimmune diseases in the community setting. *Arch Intern Med* 2004;164(22):2435-41. doi: 10.1001/archinte.164.22.2435 [published Online First: 2004/12/15]
11. Rolfe A, Burton C. Reassurance after diagnostic testing with a low pretest probability of serious disease: systematic review and meta-analysis. *JAMA Intern Med* 2013;173(6):407-16. doi: 10.1001/jamainternmed.2013.2762 [published Online First: 2013/02/27]
12. Mohammed AS, Boddu P, Mael D, et al. Inappropriate use of commercial Antinuclear Antibody Testing in a community-based US hospital: a retrospective study. *J Community Hosp Intern Med Perspect* 2016;6(4):32031. doi: 10.3402/jchimp.v6.32031 [published Online First: 2016/09/10]
13. Mohammadi S, Shaik I, Chevli P, et al. Improper use of Antinuclear Antibody (ANA) test can result in misdiagnosis, increased patient anxiety, and wasted health care resources [abstract]. *Arthritis Rheumatol* 2014;66
14. Agmon-Levin N, Damoiseaux J, Kallenberg C, et al. International recommendations for the assessment of autoantibodies to cellular antigens referred to as anti-nuclear antibodies. *Ann Rheum Dis* 2014;73(1):17-23. doi: 10.1136/annrheumdis-2013-203863 [published Online First: 2013/10/16]

15. Yazdany J, Schmajuk G, Robbins M, et al. Choosing wisely: the American College of Rheumatology's Top 5 list of things physicians and patients should question. *Arthritis Care Res (Hoboken)* 2013;65(3):329-39. doi: 10.1002/acr.21930 [published Online First: 2013/02/26]
16. Kavanaugh A, Tomar R, Reveille J, et al. Guidelines for clinical use of the antinuclear antibody test and tests for specific autoantibodies to nuclear antigens. American College of Pathologists. *Arch Pathol Lab Med* 2000;124(1):71-81. doi: 10.1043/0003-9985(2000)124<0071:GFCUOT>2.0.CO;2 [published Online First: 2000/01/11]
17. Chow SL, Carter Thorne J, Bell MJ, et al. Choosing wisely: the Canadian Rheumatology Association's list of 5 items physicians and patients should question. *J Rheumatol* 2015;42(4):682-9. doi: 10.3899/jrheum.141140 [published Online First: 2015/02/03]
18. Ungprasert P, Sagar V, Crowson CS, et al. Incidence of systemic lupus erythematosus in a population-based cohort using revised 1997 American College of Rheumatology and the 2012 Systemic Lupus International Collaborating Clinics classification criteria. *Lupus* 2017;26(3):240-47. doi: 10.1177/0961203316657434 [published Online First: 2016/07/02]
19. Fatoye F, Gebrye T, Svenson LW. Real-world incidence and prevalence of systemic lupus erythematosus in Alberta, Canada. *Rheumatol Int* 2018;38(9):1721-26. doi: 10.1007/s00296-018-4091-4 [published Online First: 2018/07/11]
20. Mayes MD. Scleroderma epidemiology. *Rheum Dis Clin North Am* 2003;29(2):239-54. [published Online First: 2003/07/05]
21. Man A, Shojanian K, Phoon C, et al. An evaluation of autoimmune antibody testing patterns in a Canadian health region and an evaluation of a laboratory algorithm aimed at reducing unnecessary testing. *Clin Rheumatol* 2013;32(5):601-8. doi: 10.1007/s10067-012-2141-y [published Online First: 2013/01/08]
22. Abeles AM, Abeles M. The clinical utility of a positive antinuclear antibody test result. *Am J Med* 2013;126(4):342-8. doi: 10.1016/j.amjmed.2012.09.014 [published Online First: 2013/02/12]
23. StatisticsCanada. Canada's ethnocultural portrait: The changing mosaic. 2001 Census: analysis series, 2003.
24. Statistics Canada. Population by year, by province and territory 2016. Available: <http://www.statcan.gc.ca/tables-tableaux/sum-som/l01/cst01/demo02a-eng.htm>. [
25. Lake S, Gakhal N, Steiman A, et al. The Frequency and Cost of Repeat ANA Testing at Two University of Toronto-affiliated Teaching Hospitals. *J Rheumatol* 2018;45(7):1036-37.
26. Davis LA, Goldstein B, Tran V, et al. Applying Choosing Wisely: Antinuclear Antibody (ANA) and Sub-Serology Testing in a Safety Net Hospital System. *Open Rheumatol J* 2015;9:82-7. doi: 10.2174/1874312901409010082 [published Online First: 2016/02/11]
27. Bulbin D, Meadows A, Denio A, et al. Do Rheumatologists (and Other Specialists) Practice What We Preach? A Study Of Serology Ordering Patterns With Attention To Subserologies When The Antinuclear Antibody By Enzyme Linked Immunosorbent Assay Is Negative; And The Clinical Significance Of These Positive Subserology Results [abstract]. *Arthritis Rheum* 2013;65:S1-S1331.
28. Lesuis N, Hulscher ME, Piek E, et al. Choosing Wisely in Daily Practice: An Intervention Study on Antinuclear Antibody Testing by Rheumatologists. *Arthritis Care Res (Hoboken)* 2016;68(4):562-9. doi: 10.1002/acr.22725 [published Online First: 2015/09/29]
29. Zeiadin N, Avern H. CRA Survey Results: Choosing Wisely. *Canadian Rheumatology Association Journal* 2018;28 (3):26-28.

- 1  
2  
3 30. Naugler C, Thomas R, Turin TC, et al. Yearly Clinical Laboratory Test Expenditures for  
4 Different Medical Specialties in a Major Canadian City. *Am J Clin Pathol* 2015;144(1):97-  
5 102. doi: 10.1309/AJCP80REPIUGVXPH [published Online First: 2015/06/14]  
6  
7 31. Pediatric Rheumatology: Five Things Physicians and Patients Should Question  
8 [http://www.choosingwisely.org/societies/american-college-of-rheumatology-pediatric-  
10 rheumatology/](http://www.choosingwisely.org/societies/american-college-of-rheumatology-pediatric-<br/>9 rheumatology/); American College of Rheumatology; 2013 [accessed July 2019 2019].  
11 32. Solomon DH, Kavanaugh AJ, Schur PH, et al. Evidence-based guidelines for the use of  
12 immunologic tests: antinuclear antibody testing. *Arthritis Rheum* 2002;47(4):434-44. doi:  
13 10.1002/art.10561 [published Online First: 2002/09/05]  
14 33. Raissi TC, Hewson C, Pope JE. Repeat Testing of Antibodies and Complements in Systemic  
15 Lupus Erythematosus: When Is It Enough? *Journal of Rheumatology* 2018;45(6):827-34.  
16 34. Sadowski BW, Lane AB, Wood SM, et al. High-Value, Cost-Conscious Care: Iterative Systems-  
17 Based Interventions to Reduce Unnecessary Laboratory Testing. *Am J Med*  
18 2017;130(9):1112 e1-12 e7. doi: 10.1016/j.amjmed.2017.02.029 [published Online First:  
19 2017/03/28]  
20  
21  
22  
23  
24  
25  
26  
27  
28  
29  
30  
31  
32  
33  
34  
35  
36  
37  
38  
39  
40  
41  
42  
43  
44  
45  
46  
47  
48  
49  
50  
51  
52  
53  
54  
55

Figure 1. Number of Repeated ANA Tests by time interval

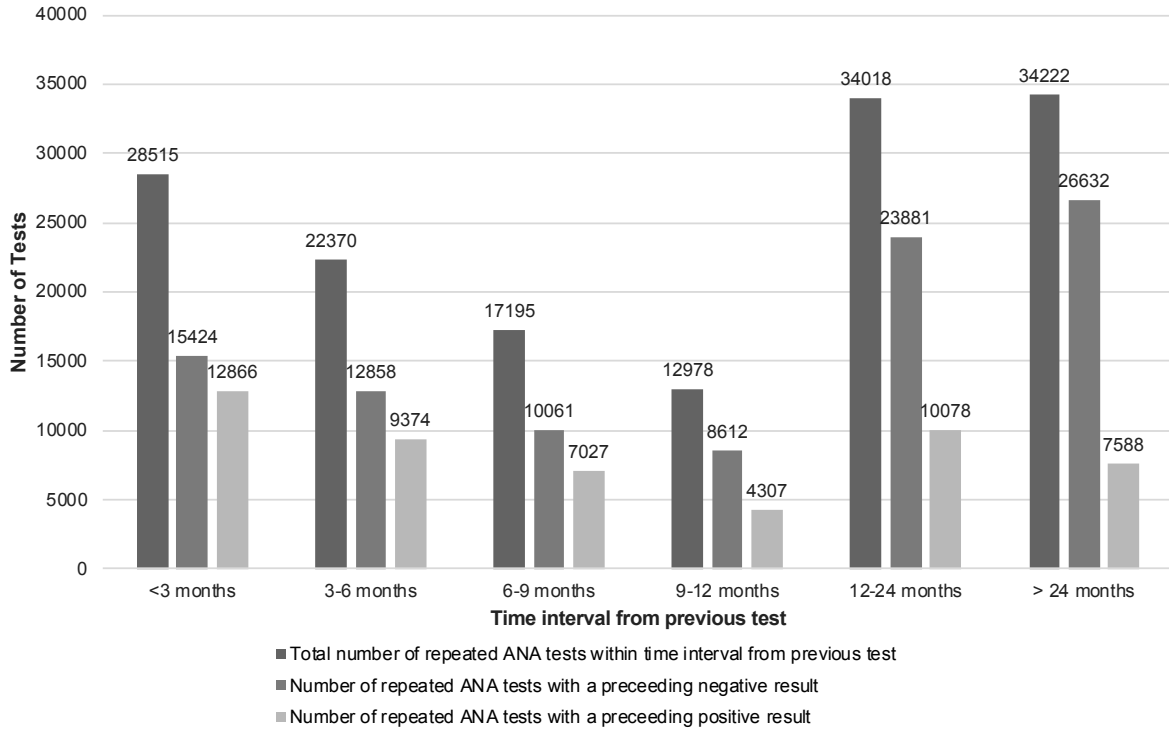

**Table 1. Frequency of total and repeat ANA tests overall and by ordering physician type**

|                                                                                           | Total   | Family Physicians | Rheumatologists | Internal Medicine | All other practitioners |
|-------------------------------------------------------------------------------------------|---------|-------------------|-----------------|-------------------|-------------------------|
| <b>Care Practitioners performing ANA tests</b>                                            |         |                   |                 |                   |                         |
| Number                                                                                    | 7,136   | 4,643             | 188             | 313               | 1,992                   |
| Percent of Total Number of Providers                                                      | 100%    | 65.1%             | 2.6%            | 4.4%              | 27.9%                   |
| <b>Volume of ANA Tests</b>                                                                |         |                   |                 |                   |                         |
| Number                                                                                    | 587,357 | 358,422           | 65,071          | 26,409            | 137,455                 |
| Percent of Total Number of Tests                                                          | 100%    | 61.0%             | 11.1%           | 4.5%              | 23.4%                   |
| <b>Positive ANA Test Result</b>                                                           |         |                   |                 |                   |                         |
| Number                                                                                    | 126,322 | 64,262            | 28,393          | 5,884             | 27,783                  |
| Percent of Positive Results out of Total Number of Tests                                  | 21.5%   | 17.9%             | 43.6%           | 22.3%             | 20.2%                   |
| <b>Repeat ANA tests within 12mo regardless of who performed the previous test</b>         |         |                   |                 |                   |                         |
| Number                                                                                    | 82,332  | 32,994            | 23,507          | 4,707             | 21,124                  |
| Percent of Repeat Tests within Each Provider Type                                         | 14.0%   | 9.2%              | 36.1%           | 17.8%             | 15.4%                   |
| <b>Repeat ANA tests within 12mo by same provider type who performed the previous test</b> |         |                   |                 |                   |                         |
| Number                                                                                    | 51,411  | 25,213            | 13,093          | 1,656             | 11,071                  |
| Percent of Repeat Tests within Each Provider Type                                         | 8.8%    | 7.0%              | 20.1%           | 6.3%              | 22.3%                   |

**Table 2. Characteristics of Ontario Patients with ANA tests, n (%) unless otherwise indicated**

|                                                               | <b>Total</b>    | <b>Only 1 ANA Test</b> | <b>Multiple ANA Tests</b> |
|---------------------------------------------------------------|-----------------|------------------------|---------------------------|
| <b>Number of patients with ANA tests</b>                      | 437,966         | 346,296 (79%)          | 91,691 (21%)              |
| <b>Mean (SD) age, years</b>                                   | 52.43 (16.30)   | 51.9 (16.5)            | 54.5 (15.3)               |
| <b>Female</b>                                                 | 294,130 (67.2%) | 226,363 (65.4%)        | 67,767 (73.9%)            |
| <b>Connective tissue disease<sup>1</sup></b>                  | 24,037 (5.5%)   | 13,610 (3.9%)          | 10,427 (11.4%)            |
| <b>Hospitalization in the preceding 2 years of index date</b> | 66,345 (15.1%)  | 51,204 (14.8%)         | 15,141 (16.5%)            |
| <b>Urban residence</b>                                        | 378,822 (86.5%) | 299,480 (86.5%)        | 79,342 (86.5%)            |

<sup>1</sup>Presence of or testing for connective tissue disease from 1 year prior to 6 months after index date

Confidential

1  
2  
3  
4  
5  
6  
7  
8  
9  
10  
11  
12  
13  
14  
15  
16  
17  
18  
19  
20  
21  
22  
23  
24  
25  
26  
27  
28  
29  
30  
31  
32  
33  
34  
35  
36  
37  
38  
39  
40  
41  
42  
43  
44  
45  
46  
47

**Table 3. Provider and Patient Characteristics Associated with Repeat ANA testing within 12 months, and repeat testing after a positive test presented as Adjusted Odds Ratios (ORs) with 95% Confidence Intervals (CIs)**

| Factors                                                | Any Physician                                      |                                            | Same Physician                                     |                                            |
|--------------------------------------------------------|----------------------------------------------------|--------------------------------------------|----------------------------------------------------|--------------------------------------------|
|                                                        | Repeat Testing within 12 months of a previous test | Repeat Testing after a prior positive test | Repeat Testing within 12 months of a previous test | Repeat Testing after a prior positive test |
| <b>Physician Characteristics</b>                       |                                                    |                                            |                                                    |                                            |
| Family physicians (Ref = Rheumatologists)              | 0.26 (0.22,0.31)                                   | 0.23 (0.20,0.28)                           | 0.80 (0.64,1.00)                                   | 0.55 (0.44,0.69)                           |
| Internal Medicine (Ref = Rheumatologists)              | 0.59 (0.44, 0.79)                                  | 0.58 (0.44,0.76)                           | 0.63 (0.47,0.85)                                   | 0.66 (0.50,0.87)                           |
| All other practitioners (Ref = Rheumatologists)        | 0.39 (0.32,0.48)                                   | 0.33 (0.26,0.42)                           | 0.63 (0.47,0.84)                                   | 0.56 (0.42,0.73)                           |
| Physician age < 50 years (Ref = >50 years of age)      | 0.98 (0.88,1.10)                                   | 0.90 (0.79,1.03)                           | 1.29 (1.15,1.46)                                   | 1.12 (0.97,1.29)                           |
| Female physician gender (Ref = male)                   | 0.93 (0.84,1.03)                                   | 1.05 (0.93,1.19)                           | 0.95 (0.85,1.07)                                   | 1.10 (0.96,1.27)                           |
| Academic Centre (Ref = community practice)             | 1.53 (0.87,2.69)                                   | 1.32 (0.83,2.12)                           | 1.53 (0.94,2.48)                                   | 1.33 (0.89,1.98)                           |
| International medical school graduate (Ref = Canadian) | 0.96 (0.87,1.07)                                   | 0.91 (0.80,1.05)                           | 0.81 (0.70,0.93)                                   | 0.75 (0.63,0.88)                           |
| <b>Patient Characteristics</b>                         |                                                    |                                            |                                                    |                                            |
| Patient Age                                            | 1.01 (1.00,1.01)                                   | 1.00 (1.00,1.01)                           | 1.01 (1.01,1.01)                                   | 1.01 (1.00,1.01)                           |
| Female Patient Sex (Ref = male)                        | 1.29 (1.25,1.34)                                   | 1.82 (1.73,1.91)                           | 1.29 (1.23,1.36)                                   | 1.83 (1.72,1.94)                           |
| Income quintile <sup>1</sup> (Ref = 1 lowest)          |                                                    |                                            |                                                    |                                            |
| 2                                                      | 1.03 (0.99,1.07)                                   | 1.06 (1.00,1.12)                           | 1.05 (1.00,1.10)                                   | 1.06 (0.99,1.15)                           |
| 3                                                      | 1.05 (1.01,1.10)                                   | 1.12 (1.06,1.19)                           | 1.04 (0.99,1.09)                                   | 1.10 (1.02,1.19)                           |
| 4                                                      | 1.07 (1.03,1.12)                                   | 1.19 (1.12,1.26)                           | 1.04 (0.99,1.10)                                   | 1.16 (1.07,1.25)                           |
| 5 (highest)                                            | 1.08 (1.03,1.12)                                   | 1.17 (1.10,1.25)                           | 1.02 (0.97,1.07)                                   | 1.10 (1.01,1.19)                           |
| Urban residence (Ref = rural)                          | 0.93 (0.86,0.99)                                   | 0.96 (0.89,1.05)                           | 1.01 (0.93,1.09)                                   | 1.03 (0.94,1.13)                           |
| Connective tissue disease <sup>2</sup>                 | 2.20 (2.01,2.41)                                   | 4.18 (3.70,4.73)                           | 3.08 (2.70,3.51)                                   | 5.37 (4.69,6.14)                           |
| Hospitalization in previous 6 months                   | 0.95 (0.89,1.00)                                   | 0.92 (0.83,1.02)                           | 0.92 (0.84,1.01)                                   | 0.94 (0.80,1.10)                           |
| Charlson Index <sup>3</sup> (Ref = 0)                  |                                                    |                                            |                                                    |                                            |
| 1                                                      | 1.17 (1.10,1.25)                                   | 1.14 (1.03,1.26)                           | 1.20 (1.10,1.30)                                   | 1.18 (1.04,1.34)                           |
| ≥ 2                                                    | 1.11 (1.02,1.21)                                   | 0.97 (0.86,1.09)                           | 1.16 (1.05,1.29)                                   | 0.98 (0.85,1.13)                           |

Also adjusted for year of testing as a covariate;<sup>1</sup>Income quintile based upon subjects' postal code and census neighbourhood income quintile  
<sup>2</sup>Suspected or confirmed connective tissue disease based on diagnosis codes;<sup>3</sup>Charlson comorbidity score (with a 2-year pre-index lookback period)



1  
2  
3  
4  
5  
6  
7  
8  
9  
10  
11  
12  
13  
14  
15  
16  
17  
18  
19  
20  
21  
22  
23  
24  
25  
26  
27  
28  
29  
30  
31  
32  
33  
34  
35  
36  
37  
38  
39  
40  
41  
42  
43  
44  
45  
46  
47  
48  
49  
50  
51  
52  
53  
54  
55  
56  
57  
58  
59  
60

Confidential
